# Supplementary material for: A unique and discrete Ce(iii) macrocyclic complex exhibits ferroelectric, dielectric, and slow relaxation of magnetization properties
Source: Royal Society of Chemistry journal article supplement (doi:10.1039/d2qi00369d), 2022-01-01
Supplement: d2qi00369d1.pdf [file d2qi00369d1.pdf]

## Electronic Supporting Information

### A Unique and Discrete Ce(III) Macrocyclic Complex Exhibits Ferroelectricity, Dielectric and Slow relaxation of Magnetization

Mohd Wasim,<sup>a</sup> Kamal Uddin Ansari,<sup>a</sup> Pardeep Kumar,<sup>a</sup> Binit Mallick<sup>b</sup> and Maheswaran Shanmugam,<sup>\*a</sup>

<sup>a</sup>Department of Chemistry, Indian Institute of Technology Bombay, Powai, Mumbai-400076, Maharashtra, India.

<sup>b</sup>Department of Electrical Engineering, Indian Institute of Technology Bombay, Powai, Mumbai-400076, Maharashtra, India.

#### Materials and Methods

Selenium dioxide (SeO<sub>2</sub>) and o-phenylenediamine (PD) were purchased from Sigma Aldrich and PD was sublimed before use. Ce(NO<sub>3</sub>)<sub>3</sub>·6H<sub>2</sub>O was purchased from Alfa Aesar and used without any further purification. Complex **1** was synthesized using the method reported.<sup>1</sup> The polycrystalline thin film of complex **1** on Si wafer (1 cm x 1 cm) substrate was made by drop-casting the saturated solution of **1** in DMF on Si substrate and evaporation of the solvent under fume hood at ambient condition. The powder X-ray pattern of the bulk sample was recorded through an X-Ray Powder Diffraction instrument (PANalytical, Netherlands). Differential scanning calorimetry (DSC) measurement of **1** was performed on a Pyris 6 DSC (Perkin Elmer). Polarisation vs. electric field (PE) loop, dielectric constant vs. temperature at different fields, and frequency were recorded using Broadband Dielectric Spectrometer (BDS) Concept 80 (Novocontrol Technologies, Germany). Ferroelectric response in thin-film was analyzed using MFP-3D Origin (Asylum/Oxford Instruments) in contact mode with Ti/Ir (5 nm/20 nm) coated AFM tip. Magnetic susceptibility measurements of polycrystalline sample of **1** in the temperature range 1.8–300 K were performed using MPMS-XL SQUID magnetometer (Quantum Design, USA) instrument equipped with 70 kOe superconducting magnet. The second harmonic spectra of pellet sample of **1** was captured using a home build optical setup similar to a widefield microscope except for the detection part. At the detection end, we have used a spectrograph and an EMCCD (Electron Multiplying Charge Coupled Device). The incident 800 nm photon pulse (pulse width 100 fs) is produced using a Ti:Sapphire ultrafast laser (Mai Tai HP from Spectra Physics). The repetition rate of the produced pulse is 80 MHz. Using a neutral density filter and special filter, we have reduced the average power up to 40 mW on the sample. The 800 nm beam first reflected at an angle of 45° using a dichroic mirror (Thorlabs Part Number: DMSP567R) and focused onto the sample using a long working distance objective lens (Mitutoyo M Plan Apo SL 20X; N.A.=0.42;

WD=20 mm) at a normal incidence angle. The same lens is used to collect the second harmonic (400 nm) response from the sample. The harmonic response is focused into the inlet of the spectrograph (Shamrock 303i-A from Andor) using a tube lens (Thorlabs Part Number: TTL200) pass through the dichroic and guided to the spectrograph (Shamrock 303i-A from Andor) inlet. The spectra are measured using an EMCCD (Newton EMCCD: DU970P from Andor) connected at the outlet of the spectrograph.

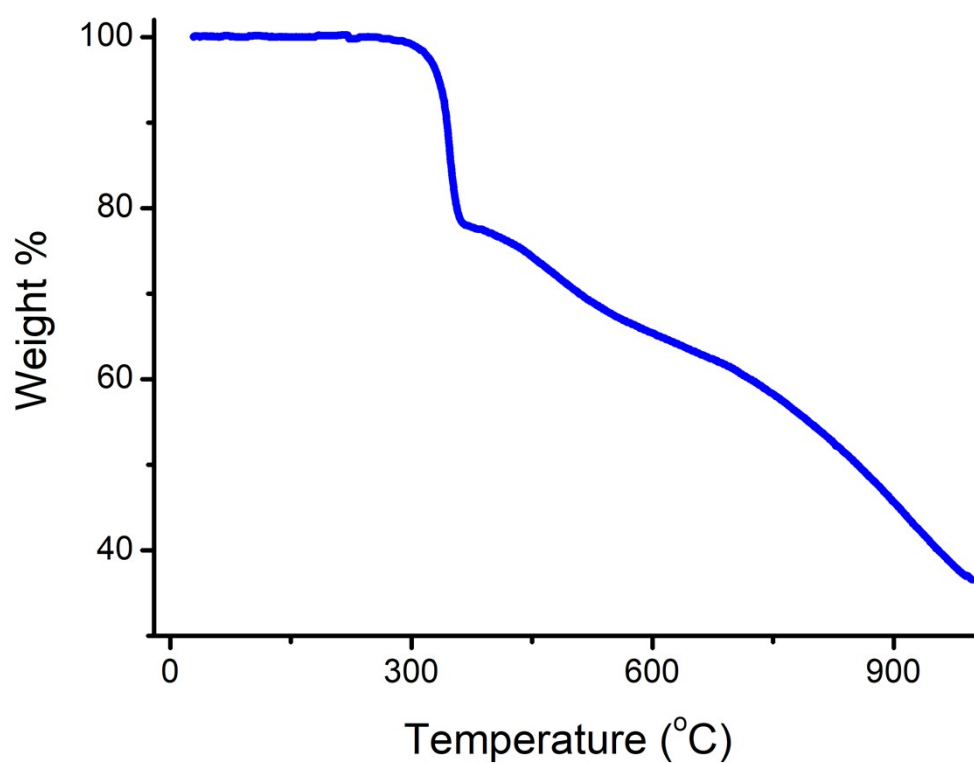

**Fig. S1** Thermo gravimetric analysis (TGA) of complex 1

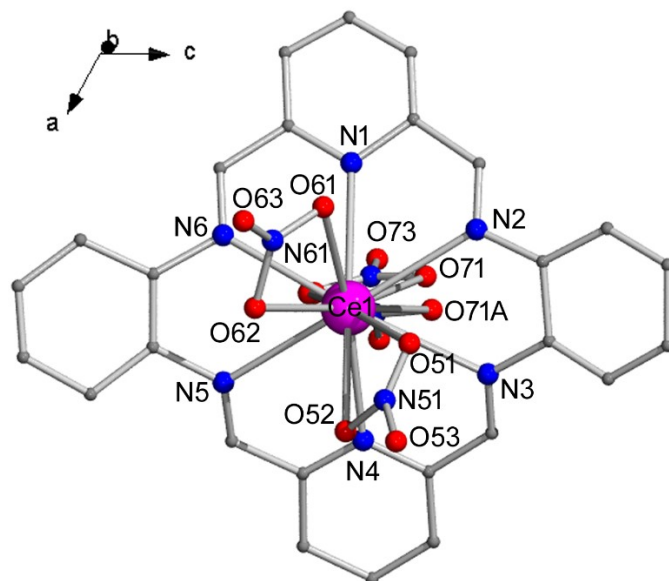

**Fig. S2** Ball and stick representation of the molecular structures of complex **1** (planar view along the b-axis). Hydrogen atoms were removed for clarity.

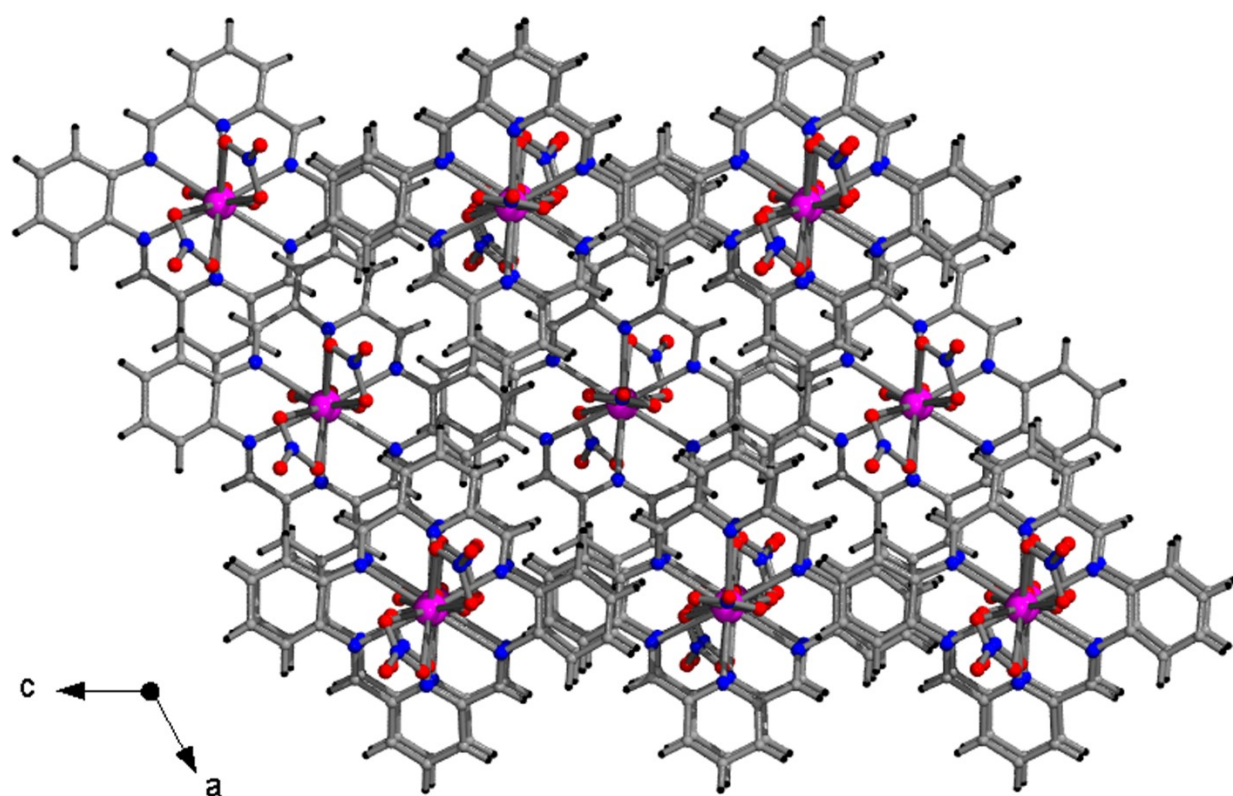

**Fig. S3** Packing of complex **1** in ac plane showing  $\pi$ - $\pi$  stacking and H-bonding. Disordered part of the nitrate was removed for the sake of clarity.

**Table S1.** Crystallographic parameters for complexes

|                                         | <b>1</b>                                                         |
|-----------------------------------------|------------------------------------------------------------------|
| Formula                                 | C <sub>26</sub> H <sub>18</sub> N <sub>9</sub> O <sub>9</sub> Ce |
| Size (mm)                               | 0.195 × 0.086 × 0.063                                            |
| System                                  | Monoclinic                                                       |
| Space group                             | Cc                                                               |
| a [Å]                                   | 15.0419(9)                                                       |
| b [Å]                                   | 10.8382(5)                                                       |
| c [Å]                                   | 19.5595(11)                                                      |
| β [°]                                   | 118.139(7)                                                       |
| V [Å <sup>3</sup> ]                     | 2811.9(3)                                                        |
| Z                                       | 4                                                                |
| ρ <sub>calcd</sub> [g/cm <sup>3</sup> ] | 1.749                                                            |
| 2θ <sub>max</sub>                       | 50                                                               |
| Radiation                               | MoK <sub>α</sub>                                                 |
| λ [Å]                                   | 0.71073                                                          |
| T [K]                                   | 298(2)                                                           |
| Reflns                                  | 8927                                                             |
| Ind. Reflns                             | 4453                                                             |
| Reflns with >2σ(I)                      | 3607                                                             |
| R <sub>1</sub>                          | 0.0596                                                           |
| wR <sub>2</sub>                         | 0.1272                                                           |

**Table S2.** Selected bond angle and bond distances for **1**

| <b>Bond length (Å)</b> |           | <b>Bond angle (°)</b> |            |
|------------------------|-----------|-----------------------|------------|
| <b>Label</b>           | <b>1</b>  | <b>Label</b>          | <b>1</b>   |
| Ce1-O51                | 2.6933(1) | N1-Ce1-N2             | 60.194(2)  |
| Ce1-O52                | 2.7587(2) | N2-Ce1-N3             | 57.211(2)  |
| Ce1-O61                | 2.6837(2) | N3-Ce1-N4             | 60.869(2)  |
| Ce1-O62                | 2.6143(1) | N4-Ce1-N5             | 61.236(2)  |
| Ce1-O71                | 2.6715(1) | N5-Ce1-N6             | 59.165(2)  |
| Ce1-O71A               | 2.7606(1) | N6-Ce1-N1             | 59.528(2)  |
| Ce1-O72                | 2.6100(1) | N1-Ce1-N4             | 139.427(4) |
| Ce1-O72A               | 2.6444(1) | O51-Ce1-O52           | 45.339(1)  |
| Ce1-N1                 | 2.7046(2) | O61-Ce1-O62           | 49.197(1)  |
| Ce1-N2                 | 2.7346(2) | O71-Ce1-O72           | 48.231(1)  |
| Ce1-N3                 | 2.7972(2) | O71A-Ce1-O72A         | 47.077(1)  |
| Ce1-N4                 | 2.6750(2) | O51-Ce1-O61           | 66.689(2)  |
| Ce1-N5                 | 2.7482(2) | O52-Ce1-O62           | 62.703(2)  |
| Ce1-N6                 | 2.6734(2) | O51-Ce1-O71           | 124.175(1) |
|                        |           | O51-Ce1-O72           | 168.172(1) |
|                        |           | O52-Ce1-O72           | 129.802(1) |
|                        |           | O52-Ce1-O71           | 131.818(1) |
|                        |           | O62-Ce1-O71           | 165.327(1) |
|                        |           | O62-Ce1-O72           | 123.418(1) |
|                        |           | O61-Ce1-O71           | 122.049(1) |
|                        |           | O61-Ce1-O72           | 124.396(1) |

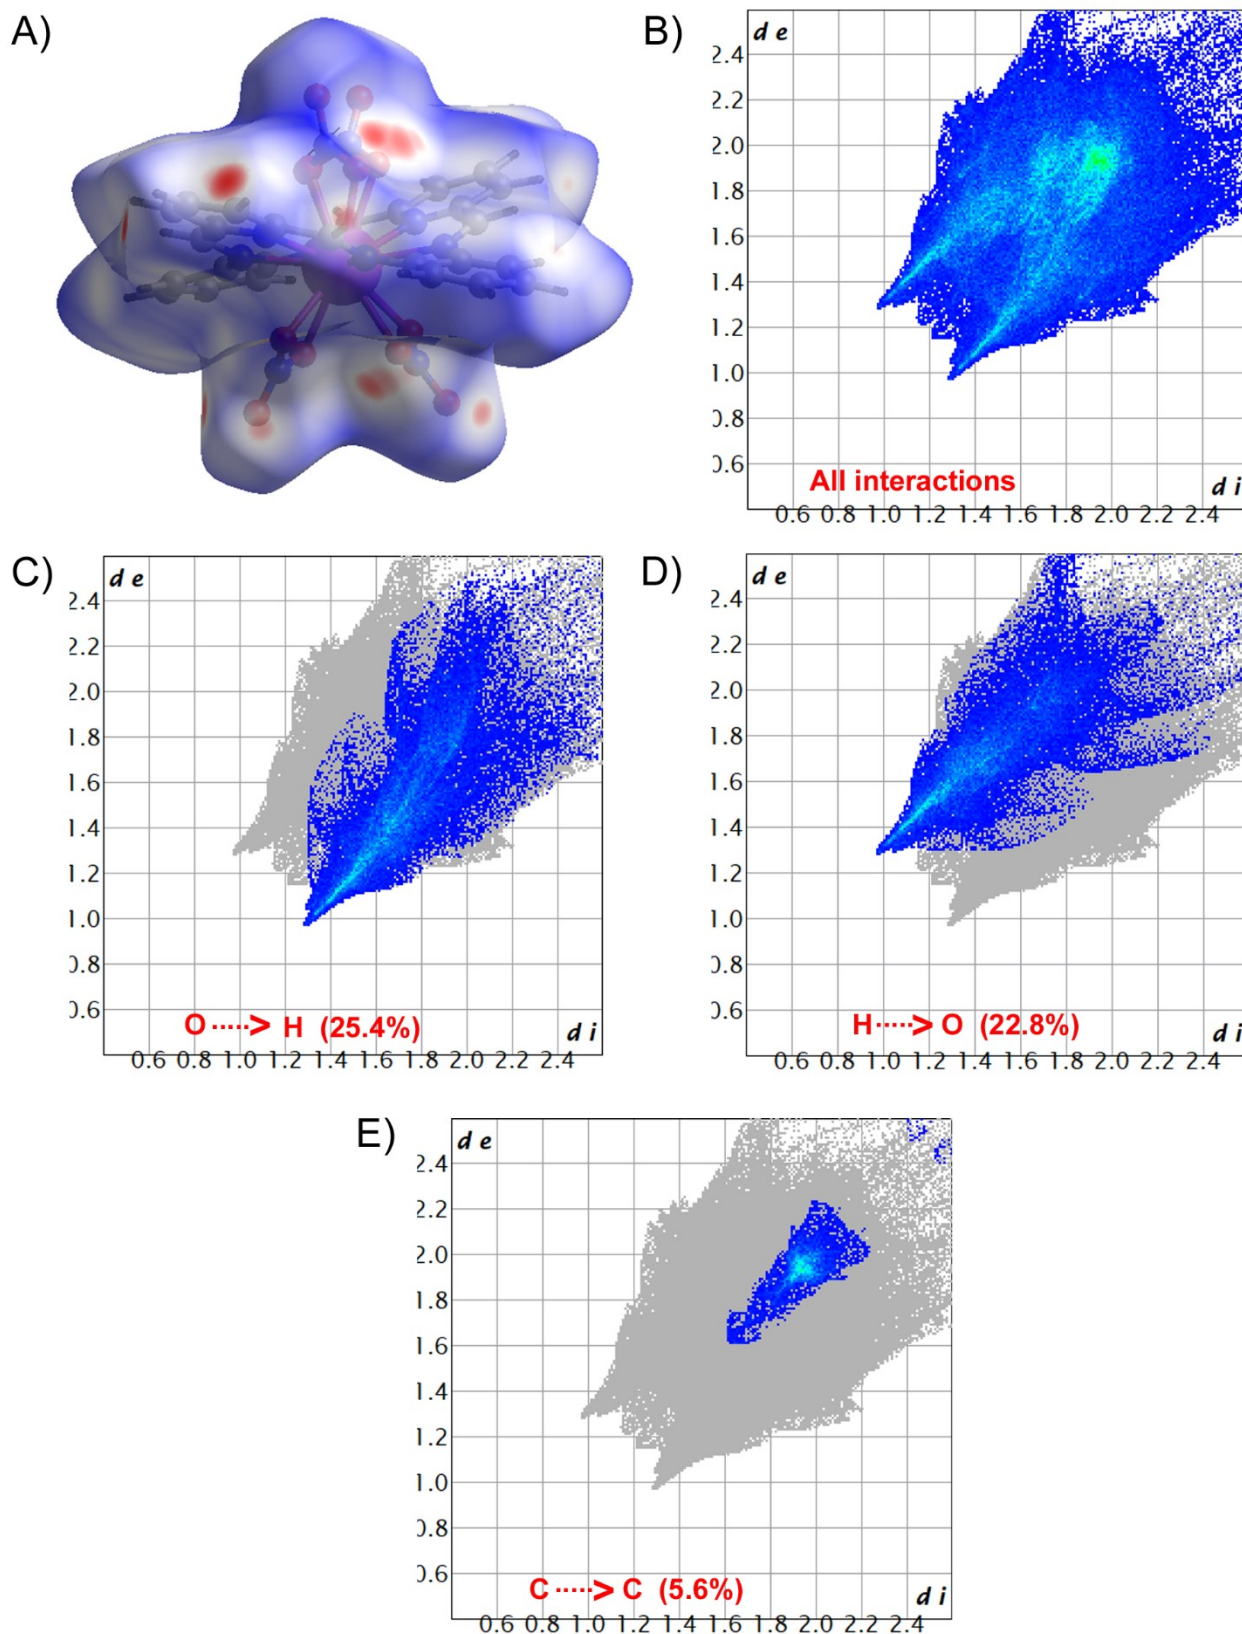

**Fig. S4** (A) Hirshfeld surface of **1** mapped with dnorm. (B), (C), (D) and (E) fingerprint plot for non-covalent interactions involving all, inside O – outside H, inside H – outside O, inside C – outside C surfaces respectively. The analysis was done using CrystalExplorer software.<sup>2</sup>

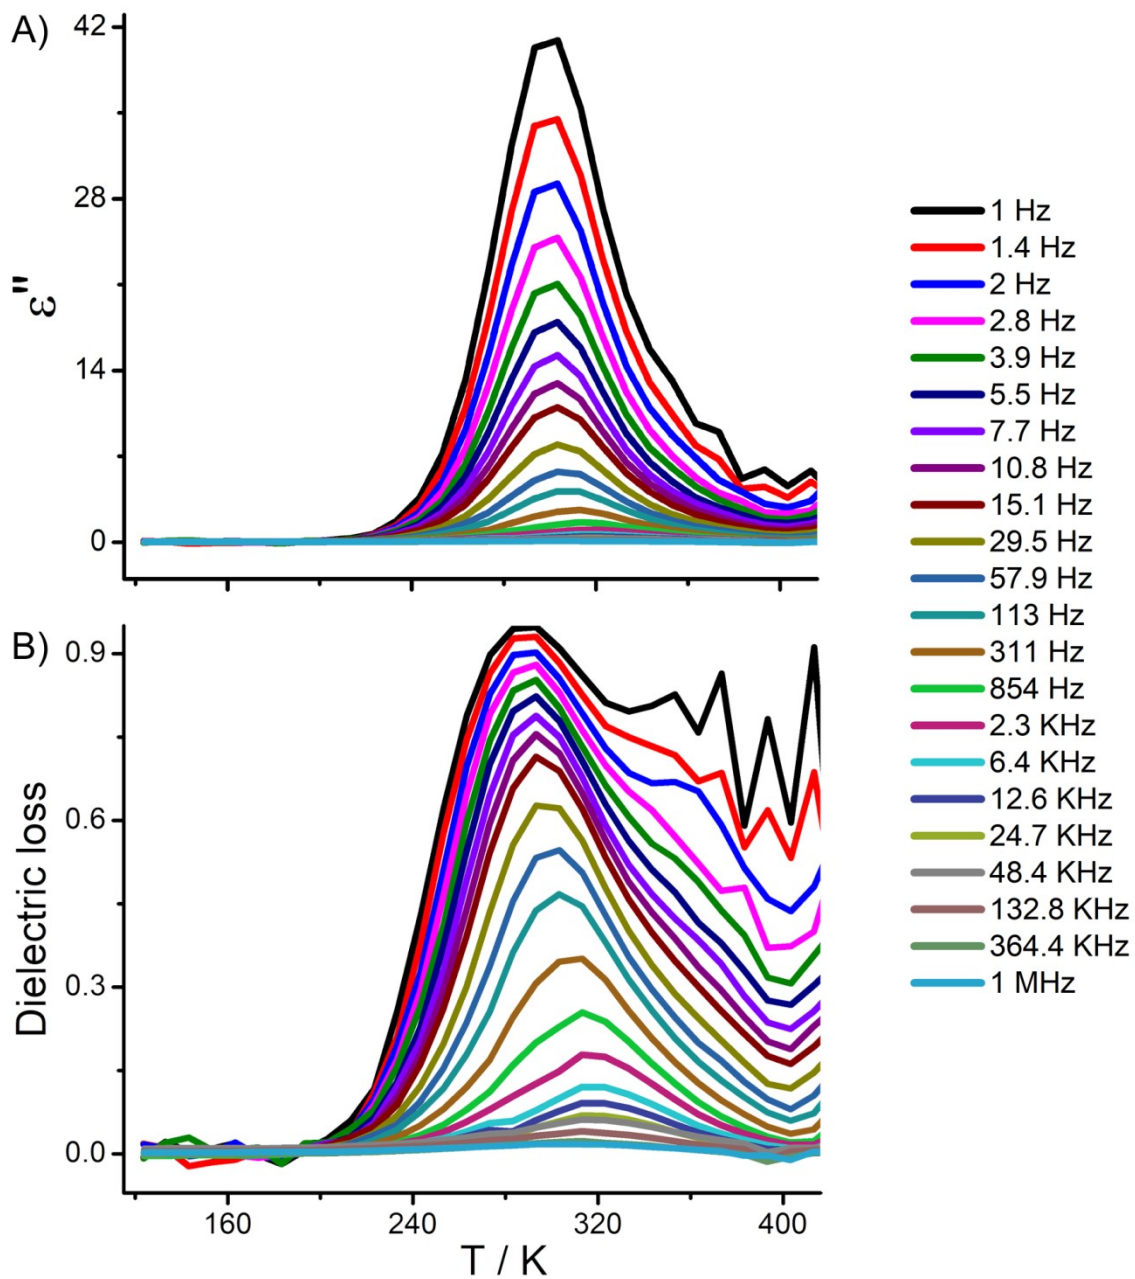

**Fig. S5** (A) Temperature dependence of imaginary part of complex dielectric constant and (B) Temperature dependence of dielectric loss in pellet sample of **1**

**Table S3** Estimated Curie-Weiss constant for para and ferroelectric phases of **1**

| Frequency | $C_{\text{para}}$ | $C_{\text{ferro}}$ | $C_{\text{para}}/C_{\text{ferro}}$ |
|-----------|-------------------|--------------------|------------------------------------|
| 1 Hz      | 793.65            | 487.80             | 1.63                               |
| 1.4 Hz    | 751.88            | 471.70             | 1.59                               |
| 2 Hz      | 724.64            | 478.47             | 1.51                               |
| 2.8 Hz    | 704.23            | 497.51             | 1.42                               |
| 3.9 Hz    | 694.44            | 510.20             | 1.36                               |
| 5.5 Hz    | 689.66            | 497.51             | 1.39                               |
| 7.7 Hz    | 684.93            | 510.20             | 1.34                               |
| 10.8 Hz   | 689.66            | 529.10             | 1.30                               |
| 15.1 Hz   | 699.30            | 549.45             | 1.27                               |
| 25.5 Hz   | 680.27            | 649.35             | 1.05                               |
| 57.9 Hz   | 735.29            | 729.93             | 1.01                               |
| 113 Hz    | 813.01            | 847.46             | 0.96                               |
| 311 Hz    | 1000              | 1136.36            | 0.88                               |
| 854 Hz    | 1298.70           | 1562.50            | 0.83                               |
| 2.3 KHz   | 1754.39           | 2272.73            | 0.77                               |
| 6.4 KHz   | 2564.10           | 2941.18            | 0.87                               |
| 12.6 KHz  | 2941.18           | 3333.33            | 0.88                               |
| 24.7 KHz  | 3571.43           | 4000.00            | 0.89                               |
| 48.4 KHz  | 4000.00           | 4761.90            | 0.84                               |
| 132.8 KHz | 4761.90           | 5882.35            | 0.81                               |
| 364.4 KHz | 6250.00           | 7142.86            | 0.87                               |
| 1MHz      | 7142.86           | 8333.33            | 0.86                               |



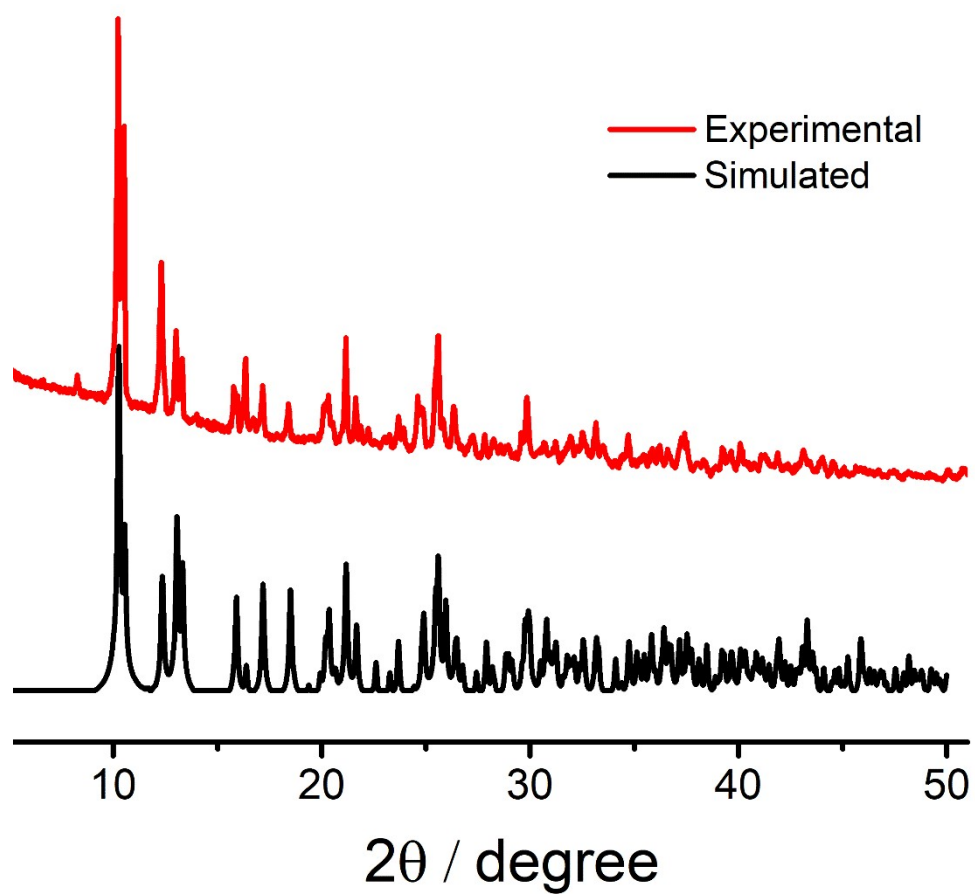

**Fig. S6** Powder X-ray diffraction pattern of a bulk sample of **1**

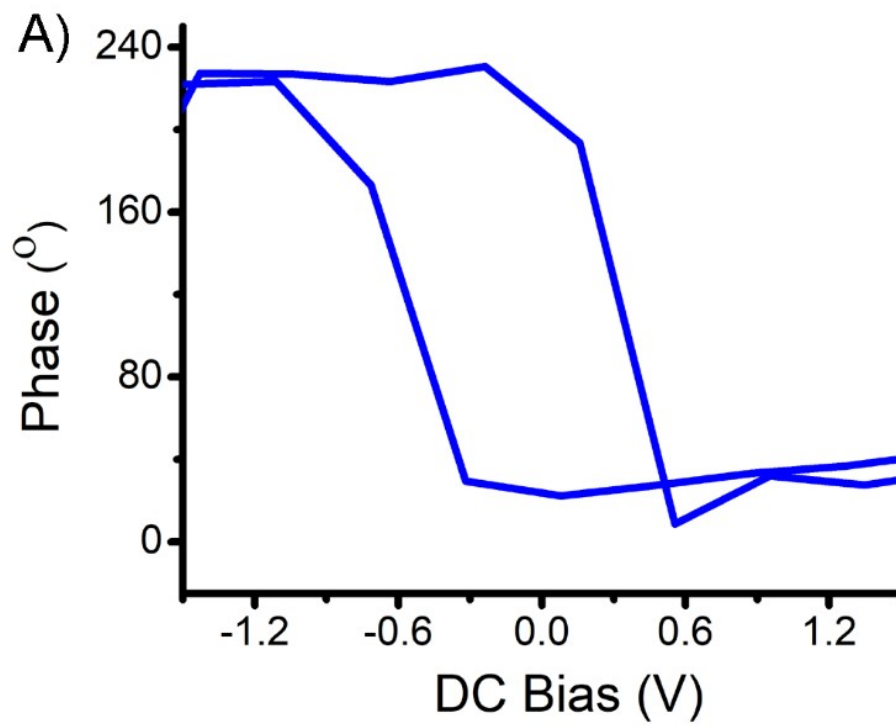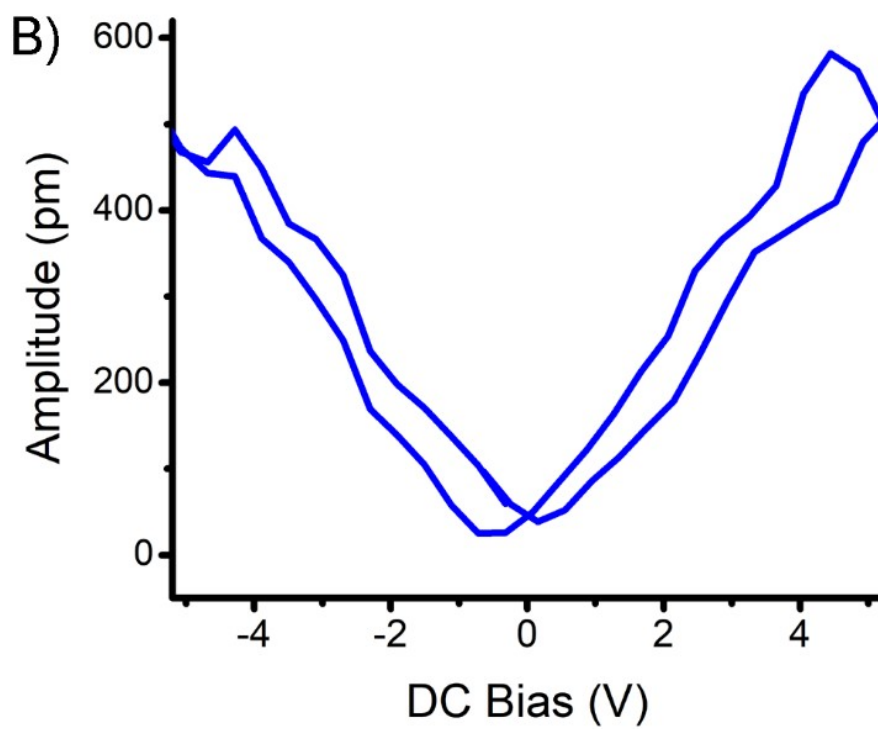

**Fig. S7** (A) Phase-Voltage hysteresis loop and (B) Amplitude-Voltage butterfly loop observed through PFM analysis of thin film of **1** with tip voltage of 2 V.

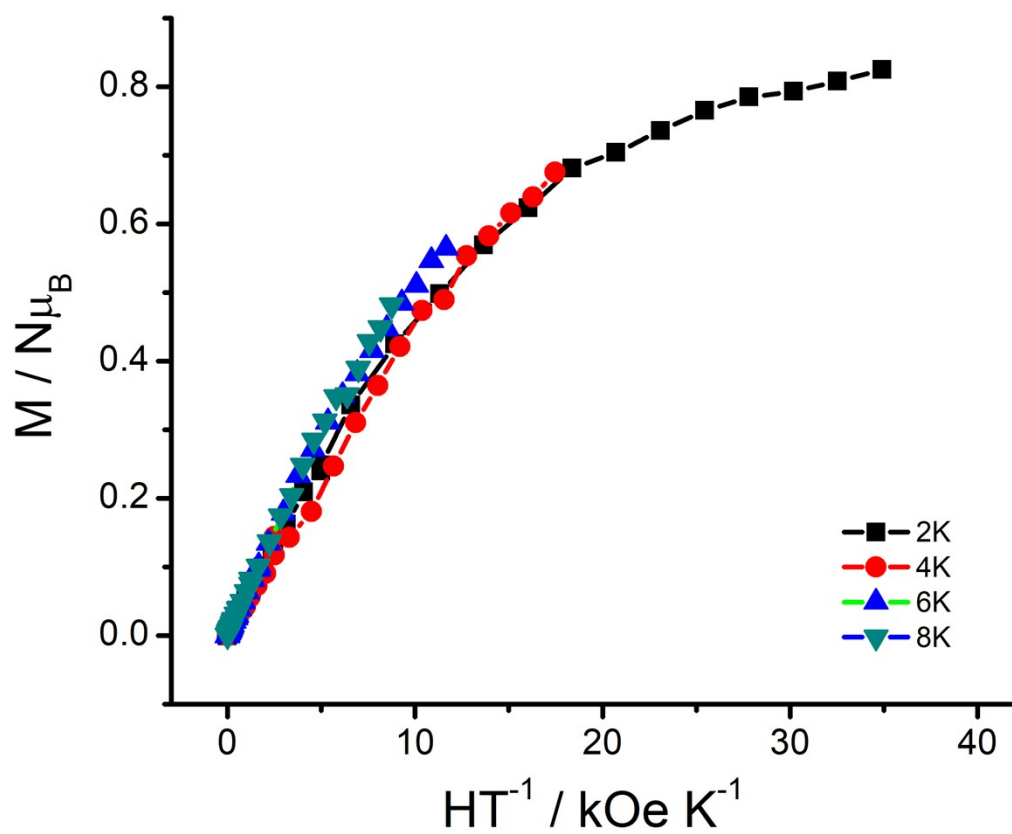

Fig. S8 Reduced magnetization curve for complex 1

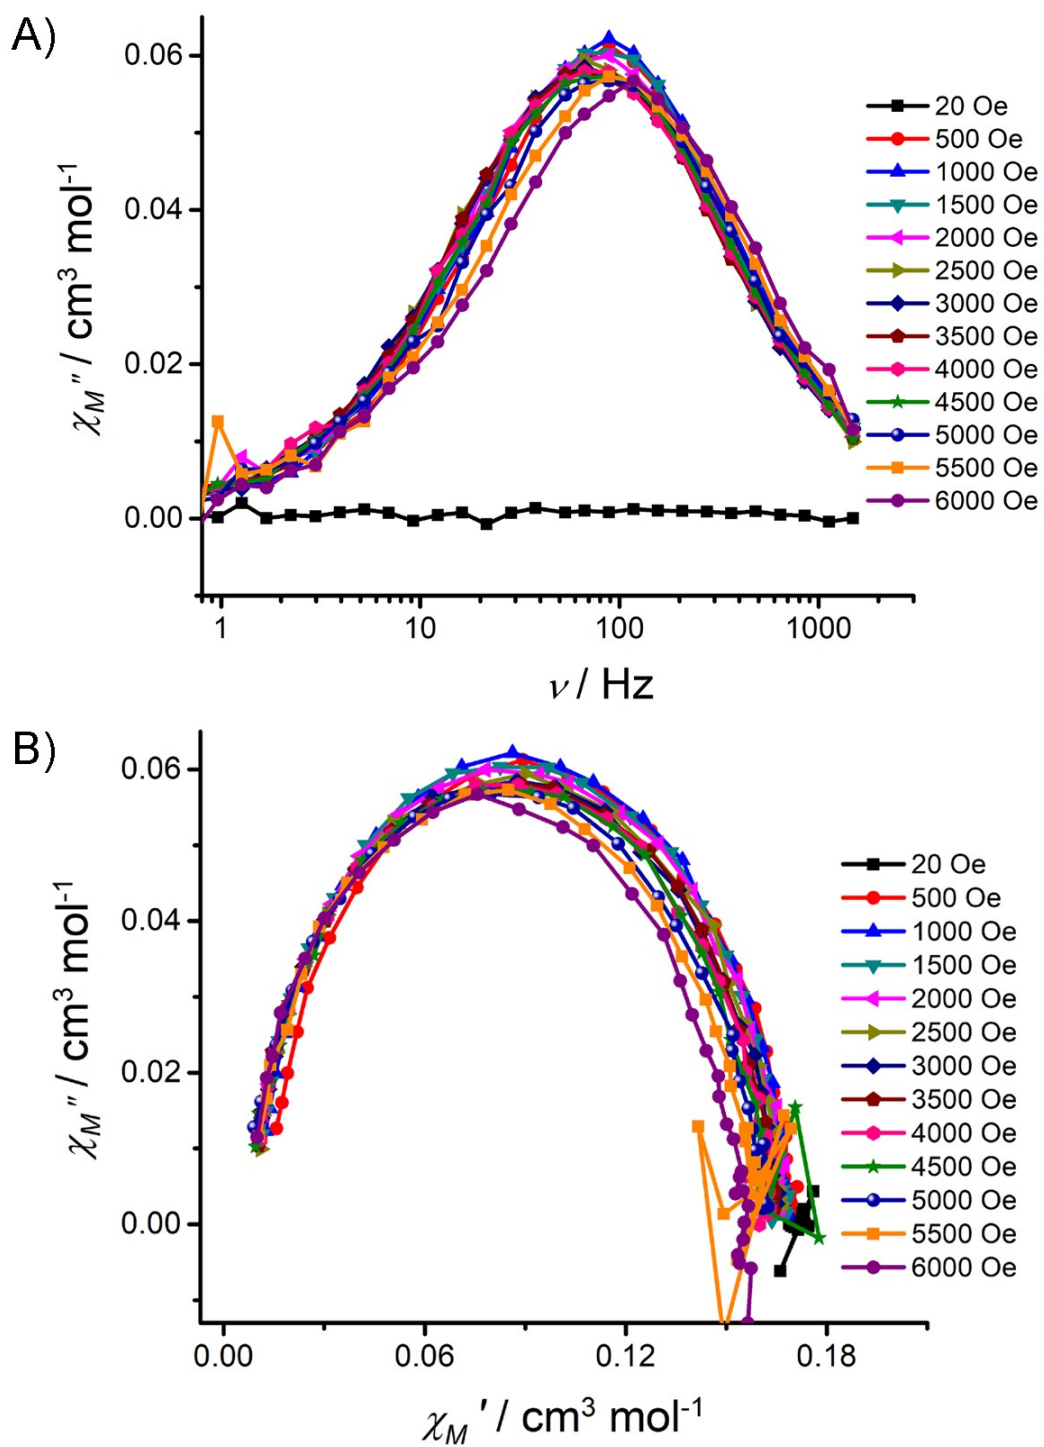

**Fig. S9** (A) Frequency dependence of out-of-phase susceptibility and (B) Cole-Cole plot for polycrystalline sample of **1** recorded at 1.8 K temperature.

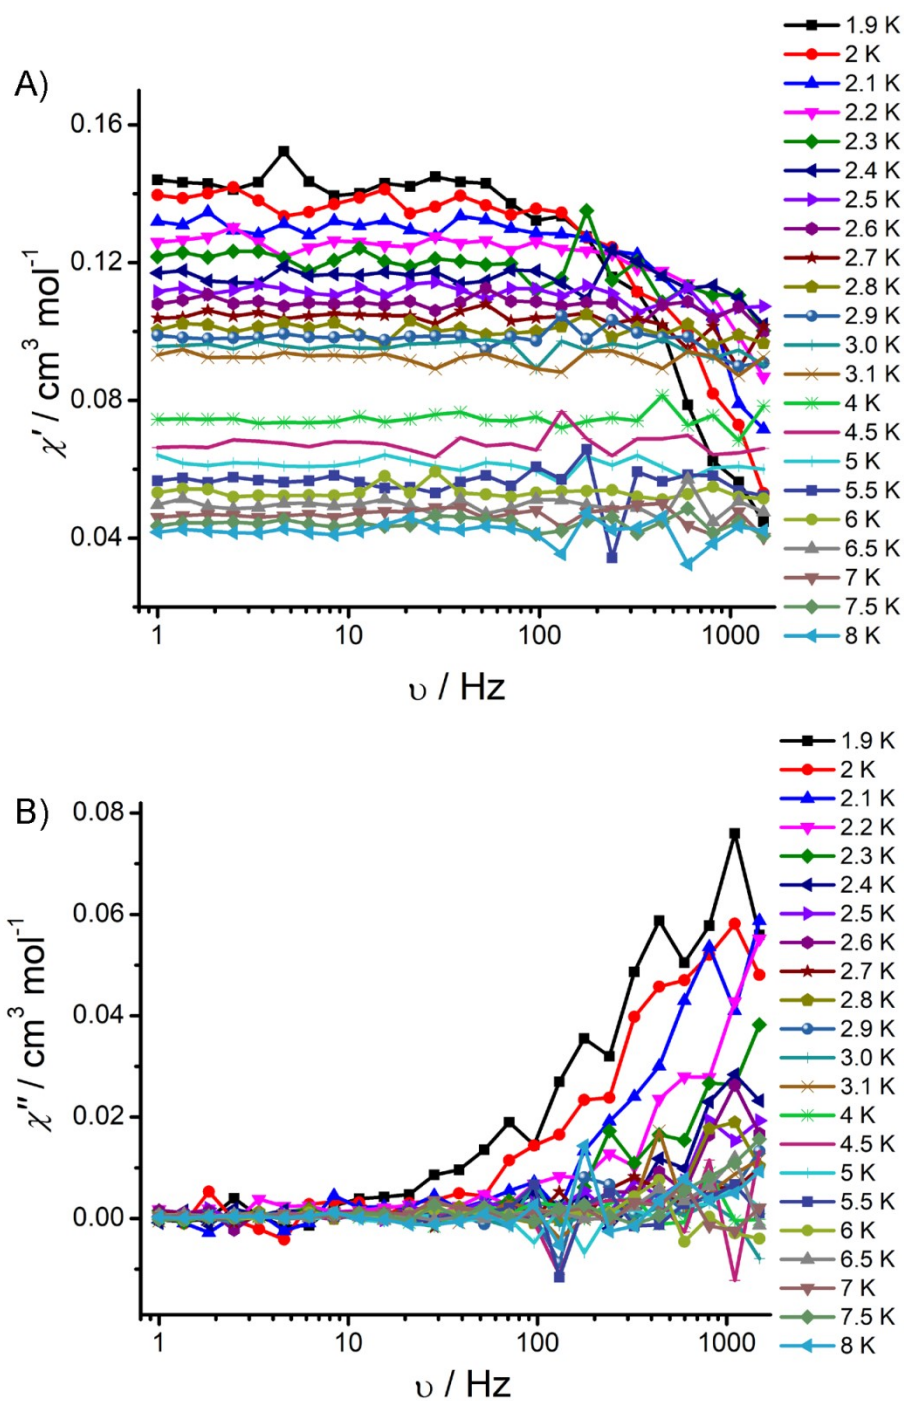

**Fig. S10** (A) and (B) frequency dependence of in-phase and out-of-phase susceptibility respectively observed for polycrystalline sample of **1** in presence of dc magnetic field ( $H_{dc} = 1500$  Oe)

$$\frac{1}{\tau} = \frac{1}{\tau_{QTM}} + \tau_0^{-1} \exp\left(\frac{-U_{eff}}{k_B T}\right) \dots\dots\dots \text{Equation S1}$$

## References

- 1 A. S. Gajarushi, M. Wasim, R. Nabi, S. Kancharlapalli, V. R. Rao, G. Rajaraman, C. Subramaniam and M. Shanmugam, *Mater. Horiz.*, 2019, **6**, 743-750.
- 2 P. R. Spackman, M. J. Turner, J. J. McKinnon, S. K. Wolff, D. J. Grimwood, D. Jayatilaka and M. A. Spackman, *J. Appl. Crystallogr.*, 2021, **54**, 1006-1011.
